# Supplementary material for: A zircon LA-ICPMS reverse depth profiling analysis method and its geological application
Source: Royal Society of Chemistry journal article supplement (doi:10.1039/d3ja00309d), 2024-01-01
Supplement: d3ja00309d1.pdf [file d3ja00309d1.pdf]

### **Table captions**

Table S1 Zircon GJ-1 LA-ICP-MS U–Pb isotopic data in this study

Table S2 Zircon Reverse depth profiling LA-ICP-MS U–Pb isotopic data

Table S3 Zircon Reverse depth profiling LA-ICP-MS trace element ( $\mu\text{g}\cdot\text{g}^{-1}$ ) data
